# Supplementary material for: Timing of oral anticoagulation in atrial fibrillation patients after acute ischaemic stroke and outcome after 3 months: results of the multicentre Berlin Atrial Fibrillation Registry
Source: PubMed Central journal article supplement — Open Heart. 2024 Sep 18;11(2):e002688. doi: 10.1136/openhrt-2024-002688 (PMC11428999; doi:10.1136/openhrt-2024-002688), 2024-09-18

## **ONLINE SUPPLEMENT**

### **Additional statistical information**

In the survival analysis analyzing composite endpoint (CE) for no oral anticoagulation (OAC) patients, patients who started OAC were censored at the time point of the start of OAC. Furthermore, Kaplan-Meier curves were used in patients who received OAC within 3 months after stroke/TIA to analyze the association of OAC timing and the occurrence of the combined endpoint stratified for 'early', 'timely' or 'late' (re-)start of OAC according to the "1-3-6-12 day rule". Group differences were compared using the log-rank test. Bivariate and multivariable Cox regression analyses were used to estimate hazard ratios (HR) for CE within 3 months after the index event. Statistical analysis was performed using SPSS (Version 29, SPSS Inc., Chicago, USA). No adjustment for multiple testing was applied. P-values have to be interpreted cautiously.

**Table S1** Baseline characteristics of 650 registry patients with known AF at the time of the index stroke/TIA, hospitalization within 72 hours of symptom onset, and completed 3 months follow-up or pre-defined clinical endpoint (recurrent ischemic stroke, systemic embolism, myocardial infarction, hemorrhagic stroke, major bleed or all-cause death) within three months after stroke/TIA according to (re-)start of oral anticoagulation (OAC) within three months after stroke/TIA.

|                                                                              | OAC (re-)start<br>n = 616 | No OAC (re-)start<br>n = 34 | p-value |
|------------------------------------------------------------------------------|---------------------------|-----------------------------|---------|
| <b>Age</b> [years], median [IQR]                                             | 78 [71-83]                | 78.5 [72.3-86.8]            | 0.287   |
| <b>Age groups</b> ; n (%)                                                    |                           |                             | 0.585   |
| 18-64 years                                                                  | 66 (10.7)                 | 2 ( 5.9)                    |         |
| 65-74 years                                                                  | 145 (23.5)                | 10 (29.4)                   |         |
| ≥75 years                                                                    | 405 (65.7)                | 22 (64.7)                   |         |
| <b>Sex (male)</b> , n (%)                                                    | 321 (52.1)                | 21 (61.8)                   | 0.295   |
| <b>Index stroke: Transient ischemic attack (TIA)</b> , n (%)                 | 173 (28.1)                | 6 (17.6)                    | 0.237   |
| <b>NIHSS score on admission</b> [points], median [IQR]                       | 2 [1-5]                   | 3 [1 - 7.75]                | 0.094   |
| <b>NIHSS score on admission</b> [points], n (%)                              |                           |                             | 0.052   |
| <8 points                                                                    | 538 (87.3)                | 25 (73.5)                   |         |
| 8-16 points                                                                  | 60 (9.7)                  | 7 (20.6)                    |         |
| >16 points                                                                   | 18 (2.9)                  | 2 ( 5.9)                    |         |
| <b>Intravenous thrombolysis</b> , n (%)                                      | 72 (11.7)                 | 4 (12.1)                    | 1.000   |
| <b>Endovascular treatment</b> , n (%)                                        | 46 (7.5)                  | 2 ( 5.9)                    | 1.000   |
| <b>Carotid endarterectomy</b> , n (%)                                        | 6 (1.0)                   | 0 ( 0.0)                    | 1.000   |
| <b>Cardiovascular risk-factors</b> , n (%)                                   |                           |                             |         |
| Hypertension                                                                 | 549 (89.1)                | 30 (88.2)                   | 0.780   |
| Heart failure                                                                | 95 (15.4)                 | 8 (23.5)                    | 0.226   |
| Diabetes mellitus                                                            | 189 (30.7)                | 10 (29.4)                   | 1.000   |
| Vascular disease                                                             | 192 (31.2)                | 14 (41.2)                   | 0.256   |
| Prior stroke or transient ischemic attack (TIA)                              | 188 (30.5)                | 8 (23.5)                    | 0.447   |
| <b>Impaired renal function at baseline</b>                                   | 267 (44.1)                | 19 (55.9)                   | 0.215   |
| <b>Oral anticoagulation at baseline</b> , n (%)                              | 396 (64.3)                | 7 (20.6)                    | <0.001  |
| <b>Selective serotonin reuptake inhibitor at baseline</b> , n (%)            | 24 (3.9)                  | 1 (3.0)                     | 1.000   |
| <b>CHA<sub>2</sub>DS<sub>2</sub>-VASc post-stroke</b> [points], median [IQR] | 6 [5-7]                   | 6 [5-7]                     | 0.470   |
| <b>HAS-BLED post-stroke</b> [points], median [IQR]                           | 3 [3-4]                   | 4 [3-5]                     | <0.001  |
| <b>In-hospital stay</b> [days], median [IQR]                                 | 5 [4-7]                   | 6 [4- 9]                    | 0.065   |

\* National Institutes of Health Scale (NIHSS)

**Table S2.** Baseline characteristics of 521 registry patients with known AF at the time of the index stroke/TIA, hospitalization within 72 hours of symptom onset, and completed 3 months follow-up or pre-defined clinical endpoint (recurrent ischemic stroke, systemic embolism, myocardial infarction, hemorrhagic stroke, major bleed or all-cause death) within three months according to (re-)starting a non-vitamin K dependent oral antagonist (NOAC) or no oral anticoagulant within three months after the index stroke/TIA according to adherence to the “1–3–6–12 days rule”<sup>7</sup>, setting adherence as reference.

|                                                                     | Non-adherence<br>n=326 | Adherence<br>(n=195) | Bivariate analysis<br>OR (95%CI) | p-value | Multivariable analysis<br>OR (95%CI) | p-value |
|---------------------------------------------------------------------|------------------------|----------------------|----------------------------------|---------|--------------------------------------|---------|
| <b>Age, median [IQR]</b>                                            | 78 [71-84]             | 77 [71-82]           | 1.00 [0.98-1.02]                 | 0.902   | 1.00 [0.96-1.04]                     | 0.931   |
| <b>Sex (male), n (%)</b>                                            | 176 (54.0)             | 98 (50.3)            | 1.16 [0.81-1.66]                 | 0.409   | 1.04 [0.51-2.12]                     | 0.916   |
| <b>Intravenous thrombolysis, n (%)</b>                              | 39 (12.0)              | 28 (14.4)            | 0.81 [0.48-1.37]                 | 0.438   | 0.38 [0.19-0.73]                     | 0.004   |
| <b>Endovascular treatment, n (%)</b>                                | 36 (11.0)              | 11 (5.6)             | 2.08 [1.03-4.18]                 | 0.041   | 2.56 [1.09-6.01]                     | 0.030   |
| <b>Carotid endarterectomy, n (%)</b>                                | 3 (0.9)                | 1 (0.5)              | 1.68 [0.19-17.44]                | 0.611   | 1.68 [0.16-18.01]                    | 0.666   |
| <b>CHA<sub>2</sub>DS<sub>2</sub>-VASc post-stroke, median [IQR]</b> | 6 [5-7]                | 6 [5-6]              | 1.02 [0.89-1.16]                 | 0.798   | 1.00 [0.56-1.79]                     | 0.992   |
| <b>HAS-BLED post-stroke, median [IQR]</b>                           | 3 [3-4]                | 3 [3-4]              | 1.24 [1.01-1.53]                 | 0.041   | 1.14 [0.82-1.59]                     | 0.422   |
| <b>Infarct size according to imaging, n (%)</b>                     |                        |                      |                                  |         |                                      |         |
| none                                                                | 132 (45.1)             | 102 (55.7)           | 1                                | 0.032   | 1                                    | 0.419   |
| small                                                               | 134 (45.7)             | 73 (39.9)            | 1.42 [0.97-2.08]                 | 0.075   | 1.18 [0.77-1.79]                     | 0.449   |
| moderate-large                                                      | 27 (9.2)               | 8 (4.4)              | 2.61 [1.14-5.98]                 | 0.024   | 1.81 [0.71-4.62]                     | 0.213   |
| <b>Hemorrhagic transformation, n (%)</b>                            | 23 (7.1)               | 7 (3.6)              | 2.04 [0.86-4.83]                 | 0.108   | 0.74 [0.26-2.11]                     | 0.569   |
| <b>In-hospital neurological deterioration, n (%)</b>                | 26 (8.0)               | 6 (3.1)              | 2.73 [1.10-6.76]                 | 0.030   | 5.25 [1.42-19.37]                    | 0.013   |
| <b>Uncontrolled arterial hypertension, n (%)</b>                    | 15 (4.6)               | 7 (3.6)              | 1.30 [0.52-3.24]                 | 0.579   | 1.08 [0.40-2.92]                     | 0.885   |
| <b>Oral anticoagulation on admission, n (%)</b>                     | 163 (50.0)             | 133 (68.2)           | 0.47 [0.32-0.68]                 | <0.001  | 0.42 [0.26-0.66]                     | <0.001  |

\* Setting adherence to the “1–3–6–12 days rule” as reference. Additionally adjusted for cardiovascular risk-factors: prior stroke or transient ischemic attack (TIA), vascular disease, diabetes mellitus, hypertension, heart failure, impaired renal function at baseline.

Excluding patients (re-)started on a VKA, 195 (40.0%) of 487 patients were (re-)started on a NOAC in adherence with the “1–3–6–12 day rule”, including 133 (46.0%) of 298 patients on OAC at the time of stroke, and 62 (31.3%) of 189 patients without OAC at stroke onset. Multivariable analysis, revealed that in-hospital neurological deterioration (OR 5.25, 95%CI 1.42-19.37), and endovascular treatment (OR 2.56, 95%CI 1.09-6.01) were associated with non-adherence to the “1–3–6–12 day rule”, while OAC intake at the time of stroke (OR 0.42, 95%CI 0.26-0.66) and intravenous thrombolysis (OR 0.38, 95%CI 0.19-0.73) were associated with adherence .

**Table S3** Multivariable multinomial logistic regression model for (non-)adherence to the “1–3–6–12 days rule”<sup>7</sup> in 650 registry patients with known AF at the time of the index stroke/TIA, hospitalization within 72 hours of symptom onset, and completed 3 months follow-up or pre-defined clinical endpoint (recurrent ischemic stroke, systemic embolism, myocardial infarction, hemorrhagic stroke, major bleed or all-cause death) within three months after the index stroke/TIA according to adherence, earlier or later or no (re-)start of OAC (setting adherence as reference).

|                                                           | Adherence<br>n=255 | “Earlier”<br>n=151 | Multivariable analysis<br>OR (95%CI) p value |       | “Later”<br>n=210 | Multivariable analysis<br>OR (95%CI) p value |         | No (re-)start<br>(n=34) | Multivariable analysis<br>OR (95%CI) p value |         |
|-----------------------------------------------------------|--------------------|--------------------|----------------------------------------------|-------|------------------|----------------------------------------------|---------|-------------------------|----------------------------------------------|---------|
| <b>Age groups; n (%)</b>                                  |                    |                    |                                              |       |                  |                                              |         |                         |                                              |         |
| <65 years                                                 | 22 (8.6)           | 13 (8.6)           | 1                                            | -     | 31 (14.8)        | 1                                            | -       | 2 (5.9)                 | 1                                            | -       |
| 65-74 years                                               | 62 (24.3)          | 42 (27.8)          | 1.01 [0.41-2.54]                             | 0.973 | 41 (19.5)        | 0.54 [0.24-1.24]                             | 0.148   | 10 (29.4)               | 0.68 [0.11-4.35]                             | 0.687   |
| >=75 years                                                | 171 (67.1)         | 96 (63.6)          | 0.83[0.34- 2.05]                             | 0.692 | 138 (65.7)       | 0.72 [0.33-1.58]                             | 0.410   | 22 (64.7)               | 0.48 [0.08-2.93]                             | 0.424   |
| <b>Endovascular treatment,<br/>n (%)</b>                  | 11 (4.3)           | 21 (13.9)          | 3.74 [1.60-8.73]                             | 0.002 | 14 (6.7)         | 0.82[0.32-2.12]                              | 0.680   | 2 (5.9)                 | 0.77 [0.13-4.51]                             | 0.773   |
| <b>HAS-BLED post-stroke,<br/>median [IQR]</b>             | 6 [5-6]            | 6 [5-7]            | 1.15 [0.84-1.58]                             | 0.373 | 6 [5-7]          | 1.05 [0.79-1.41]                             | 0.722   | 6 [5-7]                 | 2.11 [1.22-3.66]                             | 0.008   |
| <b>Infarct size according to<br/>brain imaging, n (%)</b> |                    |                    |                                              |       |                  |                                              |         |                         |                                              |         |
| none                                                      | 150 (62.5)         | 61 (42.7)          | 1                                            | -     | 89 (47.8)        | 1                                            | -       | 13 (46.4)               | 1                                            | -       |
| small                                                     | 82 (34.2)          | 79 (55.2)          | 2.01 [1.27-3.17]                             | 0.003 | 70 (37.6)        | 1.13 [0.73-1.77]                             | 0.587   | 12 (42.9)               | 0.72 [0.27-1.91]                             | 0.503   |
| moderate-large                                            | 8 (3.3)            | 3 (2.1)            | 0.71 [0.17-3.06]                             | 0.650 | 27 (14.5)        | 3.87 [1.54-9.74]                             | 0.004   | 3 (10.7)                | 1.14 [0.20-6.46]                             | 0.880   |
| <b>Hemorrhagic<br/>transformation, n (%)</b>              | 8 (3.2)            | 4 (2.6)            | 0.67 [0.18-2.44]                             | 0.543 | 19 (9.1)         | 0.92 [0.33-2.56]                             | 0.878   | 6 (17.6)                | 2.49 [0.56-11.19]                            | 0.233   |
| <b>Cardiovascular risk factors</b>                        |                    |                    |                                              |       |                  |                                              |         |                         |                                              |         |
| Vascular disease                                          | 74 (29.0)          | 57 (37.7)          | 1.43 [0.89-2.29]                             | 0.142 | 61 (29.0)        | 1.01 [0.64 -1.61]                            | 0.964   | 14 (41.2)               | 0.98 [0.38-2.52]                             | 0.965   |
| Prior stroke or TIA                                       | 82 (32.2)          | 56 (37.1)          | 1.39 [0.88 -2.20]                            | 0.153 | 50 (23.8)        | 0.73 [0.46 -1.15]                            | 0.173   | 8 (23.5)                | 0.42 [0.14-1.33]                             | 0.141   |
| <b>In-hospital neurological<br/>deterioration , n (%)</b> | 9 (3.5)            | 10 (6.6)           | 1 [0.92-8.89]                                | 0.069 | 14 (6.7)         | 3.29 [1.07-10.09]                            | 0.037   | 7 (20.6)                | 15.32 [3.33-70.54]                           | < 0.001 |
| <b>Oral anticoagulation on<br/>admission, n (%)</b>       | 190 (74.5)         | 107 (70.9)         | 1.03 [0.61-1.72]                             | 0.919 | 99 (47.1)        | 0.37 [0.24-0.58]                             | < 0.001 | 7 (20.6)                | 0.06 [0.02-0.20]                             | < 0.001 |

**Table S4** Multivariable multinomial logistic regression model for (non-)adherence to the “1–3–6–12 days rule”<sup>7</sup> in 521 registry patients with known AF at the time of the index stroke/TIA, hospitalization within 72 hours of symptom onset, and completed 3 months follow-up or pre-defined clinical endpoint (recurrent ischemic stroke, systemic embolism, myocardial infarction, hemorrhagic stroke, major bleed or all-cause death) within three months after the index stroke/TIA according to adherence, earlier or later or no (re-)start of a NOAC (setting adherence as reference).

|                                                      | Adherence<br>n=195 | “Earlier”<br>n=112 | Multivariable analysis<br>OR (95%CI) p value |        | “Later”<br>n=180 | Multivariable analysis<br>OR (95%CI) p value |       | No (re-)start<br>n=34 | Multivariable analysis<br>OR (95%CI) p value |        |
|------------------------------------------------------|--------------------|--------------------|----------------------------------------------|--------|------------------|----------------------------------------------|-------|-----------------------|----------------------------------------------|--------|
| <b>Age groups; n (%)</b>                             |                    |                    |                                              |        |                  |                                              |       |                       |                                              |        |
| <65 years                                            | 20 (10.3)          | 10 (8.9)           | 1                                            |        |                  | 1                                            |       |                       | 1                                            |        |
| 65-74 years                                          | 51 (26.2)          | 28 (25.0)          | 0.87 [0.31-2.46]                             | 0.789  | 30 (16.7)        | 0.40 [0.16-0.95]                             | 0.038 | 2 (5.9)               | 0.60 [0.09-3.88]                             | 0.592  |
| >=75 years                                           | 124 (63.6)         | 74 (66.1)          | 0.87 [0.31-2.42]                             | 0.789  | 31 (17.2)        | 0.68 [0.30-1.54]                             | 0.353 | 10 (29.4)             | 0.37 [0.06-2.37]                             | 0.297  |
| <b>Endovascular treatment, n (%)</b>                 | 11 (5.6)           | 20 (17.9)          | 4.83 [2.00-11.68]                            | <0.001 | 119 (66.1)       | 0.90 [0.35-2.36]                             | 0.833 | 22 (64.7)             | 0.71 [0.12-4.20]                             | 0.701  |
| <b>HAS-BLED post-stroke, median [IQR]</b>            | 3 [3-4]            | 3 [3-4]            | 1.30 [0.89-1.88]                             | 0.170  | 3 [3-4]          | 1.13 [0.81-1.57]                             | 0.466 | 4 [3-5]               | 2.46 [1.38-4.38]                             | 0.002  |
| <b>Infarct size according to imaging, n (%)</b>      |                    |                    |                                              |        |                  |                                              |       |                       |                                              |        |
| none                                                 | 102 (55.7)         | 43 (41.3)          | 1                                            |        | 76 (47.2)        | 1                                            |       | 13 (46.4)             | 1                                            |        |
| small                                                | 73 (39.9)          | 60 (57.7)          | 1.59 [0.94-2.71]                             | 0.085  | 62 (38.5)        | 0.96 [0.59-1.56]                             | 0.879 | 12 (42.9)             | 0.57 [0.21-1.56]                             | 0.273  |
| moderate-large                                       | 8 (4.4)            | 1 (1.0)            | 0.20 [0.02-1.77]                             | 0.147  | 23 (14.3)        | 2.96 [1.13-7.76]                             | 0.028 | 3 (10.7)              | 0.69 [0.12-4.10]                             | 0.686  |
| <b>Hemorrhagic transformation, n (%)</b>             | 7 (3.6)            | 3 (2.7)            | 0.69 [0.15-3.10]                             | 0.629  | 14 (7.8)         | 0.63 [0.20-2.00]                             | 0.436 | 6 (17.6)              | 2.13 [0.44-10.30]                            | 0.349  |
| <b>Cardiovascular risk factors</b>                   |                    |                    |                                              |        |                  |                                              |       |                       |                                              |        |
| Vascular disease                                     | 59 (30.3)          | 37 (33.0)          | 1.02 [0.58-1.78]                             | 0.954  | 53 (29.4)        | 0.93 [0.56-1.55]                             | 0.782 | 14 (41.2)             | 0.80 [0.30-2.18]                             | 0.666  |
| Prior stroke or TIA                                  | 65 (33.3)          | 44 (39.3)          | 1.49 [0.88-2.53]                             | 0.141  | 43 (23.9)        | 0.72 [0.43-1.18]                             | 0.194 | 8 (23.5)              | 0.40 [0.12-1.31]                             | 0.128  |
| <b>In-hospital neurological deterioration, n (%)</b> | 6 (3.1)            | 9 (8.0)            | 5.09 [1.28-20.26]                            | 0.021  | 10 (5.6)         | 3.99 [0.98-16.17]                            | 0.053 | 7 (20.6)              | 23.44 [4.10-133.92]                          | <0.001 |
| <b>Oral anticoagulation on admission, n (%)</b>      | 133 (68.2)         | 76 (67.9)          | 1.07 [0.60-1.91]                             | 0.814  | 80 (44.4)        | 0.43 [0.26-0.69]                             | 0.001 | 7 (20.6)              | 0.08 [0.02-0.27]                             | <0.001 |

Excluding patients (re-)started on a VKA, 112 (23.0%) of 487 patients (re-)started on a NOAC were (re-)started earlier. Multivariable analysis revealed that endovascular treatment (OR 4.83, 95%CI 2.00-11.68), and in-hospital neurological deterioration (OR 5.09, 95%CI 1.28-20.26) were associated with earlier NOAC (re-)start vs. timely (re-)start according to the “1–3–6–12 day rule”, while neither infarct size nor OAC intake at the time of stroke had an impact. Overall, 180 (37.0%) of 487 patients were (re-)started later on a NOAC. Multivariable analysis revealed that moderate or large infarct size (OR 2.96, 95%CI 1.13-7.76 vs. no imaging-detected infarction) was associated with late NOAC (re-)start compared to a timely (re-)start according to the “1–3–6–12 day rule”, while OAC intake at the time of stroke (OR 0.43, 95%CI 0.26-0.69) and age 65-74 years (OR 0.40, 95%CI 0.16-0.95 vs. age <65 years) was associated with a timely NOAC (re-)start. Comparing patients without OAC (re-)start to patients (re-)started on a NOAC in adherence to the “1–3–6–12 day rule” revealed similar findings (Table S4).

**Table S5** Antithrombotic medication at the time of recurrent ischemic stroke, transient ischemic attack (TIA), systemic embolism, myocardial infarction, hemorrhagic stroke, major bleeding or all-cause death within 3 months after index stroke or TIA in 708 registry patients with known AF

|                                        | <b>Ischemic stroke<br/>n=16</b> | <b>TIA<br/>n=15</b> | <b>Systemic embolism<br/>n=3</b> | <b>Myocardial infarction<br/>n=2</b> | <b>Hemorrhagic Stroke<br/>n=2</b> | <b>Major bleeding<br/>n=7</b> | <b>All-cause death<br/>n=12</b> | <b>Composite endpoint<br/>n=57</b> |
|----------------------------------------|---------------------------------|---------------------|----------------------------------|--------------------------------------|-----------------------------------|-------------------------------|---------------------------------|------------------------------------|
| <b>None, n (%)</b>                     | 3(21.4%)                        | 1 (7.1%)            | 1 (7.1%)                         | 0 (0.0%)                             | 2 (14.3%)                         | 0 (0.0%)                      | 7 (50.0%)                       | 14 (24.6%)                         |
| <b>Antiplatelet, n (%)</b>             | 1 (33.3%)                       | 0 (16.7%)           | 0 (0.0%)                         | 0 (0.0%)                             | 0 (0.0%)                          | 1 (33.3%)                     | 1 (33.3%)                       | 3 (5.3%)                           |
| <b>Vitamin K antagonist, n (%)</b>     | 0 (0.0%)                        | 4 (66.7%)           | 0 (0.0%)                         | 1 (16.7%)                            | 0 (0.0%)                          | 0 (0.0%)                      | 1 (16.7%)                       | 6 (10.5%)                          |
| <b>NOAC, n (%)</b>                     | 9 (31.0%)                       | 10 (34.5%)          | 2 (6.9%)                         | 1 (3.4%)                             | 0 (0.0%)                          | 6 (20.7%)                     | 1 (3.4%)                        | 29 (50.9%)                         |
| <b>Therapeutic dose heparin, n (%)</b> | 3(60.0%)                        | 0 (0.0%)            | 0 (0.0%)                         | 0 (0.0%)                             | 0 (0.0%)                          | 0 (33.3%)                     | 2 (40.0%)                       | 5 (8.8%)                           |

at the time of the index stroke/TIA, hospitalization within 72 hours of symptom onset, and known starting time of oral anticoagulation after the index stroke/TIA.

**Table S6.** Bivariate hazard ratios and multivariable hazard ratios and corresponding 95% confidence intervals on the composite endpoint (recurrent ischemic stroke or TIA, systemic embolism, myocardial infarction, hemorrhagic stroke, major bleeding or all-cause death) according to the adherence to the “1-3-6-12 day rule” for (re-)starting oral anticoagulation in 661 registry patients with known AF at the time of the index stroke/TIA, hospitalization within 72 hours of symptom onset. Patients without (re-)initiation of oral anticoagulation after the index stroke/TIA within 3 months were discarded in this analysis (N=47).

|                                                                               | No endpoint<br>(n=614) | Composite endpoint<br>(n=47) | Bivariate HR<br>(95% CI) | Bivariate<br>Cox-model<br><i>p value</i> | Multivariable<br>Cox-model*<br>HR (95% CI) | Multivariable<br>Cox-model<br><i>p value</i> |
|-------------------------------------------------------------------------------|------------------------|------------------------------|--------------------------|------------------------------------------|--------------------------------------------|----------------------------------------------|
| <b>(Re-)start of oral anticoagulation according to the 1-3-6-12 day rule”</b> |                        |                              |                          |                                          |                                            |                                              |
| Timely oral anticoagulation                                                   | 150 (24.4%)            | 12 (25.5%)                   | 1                        | 0.745                                    | 1                                          | 0.681                                        |
| Early oral anticoagulation                                                    | 263 (42.8%)            | 17 (36.2%)                   | 1.19 [0.57-2.50]         | 0.639                                    | 1.17 [0.49-2.78]                           | 0.722                                        |
| Late oral anticoagulation                                                     | 201 (32.7%)            | 18 (38.3%)                   | 1.29 [0.67-2.51]         | 0.450                                    | 1.39 [0.67-2.89]                           | 0.388                                        |

\*Additionally adjusted for age, sex, type of index event (stroke vs. transient ischemic attack), National Institutes of Health Scale (NIHSS) score on admission, intravenous thrombolysis, endovascular treatment, carotid endarterectomy, selective serotonin reuptake inhibitor at baseline, CHA2DS2-VASc post-stroke, HAS-BLED post-stroke, oral anticoagulation (OAC) on admission, cardiovascular risk-factors: prior stroke or transient ischemic attack (TIA), vascular disease, diabetes mellitus, hypertension, heart failure, impaired renal function at baseline, duration of in-hospital stay ( $\leq 5$  vs.  $>5$  days).



**Table S7.** Multivariable hazard ratios and corresponding 95% confidence intervals on the composite endpoint (recurrent ischemic stroke or TIA, systemic embolism, myocardial infarction, hemorrhagic stroke, major bleeding or all-cause death) according to the adherence to the “1-3-6-12 day rule” for (re-)starting oral anticoagulation, the type of oral anticoagulation (vitamin K antagonist [VKA] vs. non-vitamin K antagonist oral anticoagulants [NOAC]) and their interaction in 661 registry patients with known AF at the time of the index stroke/TIA, hospitalization within 72 hours of symptom onset. Patients without (re-)initiation of oral anticoagulation after the index stroke/TIA within 3 months were discarded in this analysis (N=47).

|                                                                                                      | Multivariable Cox-model*<br>HR (95% CI) | Multivariable Cox-model<br><i>p value</i> |
|------------------------------------------------------------------------------------------------------|-----------------------------------------|-------------------------------------------|
| <b>(Re-)start of oral anticoagulation according to the 1-3-6-12 day rule”</b>                        |                                         |                                           |
| Timely oral anticoagulation                                                                          | 1                                       | 0.584                                     |
| Early oral anticoagulation                                                                           | 1.08 [0.41-2.83]                        | 0.875                                     |
| Late oral anticoagulation                                                                            | 1.49 [0.69-3.21]                        | 0.314                                     |
| <b>Oral anticoagulation</b>                                                                          |                                         |                                           |
| VKA vs. NOAC                                                                                         | 0.62 [0.17-2.26]                        | 0.472                                     |
| <b>(Re-)start of oral anticoagulation according to the 1-3-6-12 day rule” * oral anticoagulation</b> |                                         |                                           |
| Timely oral anticoagulation * oral anticoagulation                                                   | 1                                       | 0.569                                     |
| Early oral anticoagulation * oral anticoagulation                                                    | 1.48 [0.23-9.55]                        | 0.683                                     |
| Late oral anticoagulation * oral anticoagulation                                                     | 0.39 [0.03-4.42]                        | 0.446                                     |

\*Additionally adjusted for age, sex, type of index event (stroke vs. transient ischemic attack), National Institutes of Health Scale (NIHSS) score on admission, intravenous thrombolysis, endovascular treatment, carotid endarterectomy, selective serotonin reuptake inhibitor at baseline, CHA2DS2-VASc post-stroke, HAS-BLED post-stroke, oral anticoagulation (OAC) on admission, cardiovascular risk-factors: prior stroke or transient ischemic attack (TIA), vascular disease, diabetes mellitus, hypertension, heart failure, impaired renal function at baseline, duration of in-hospital stay ( $\leq 5$  vs.  $>5$  days).

**Figure S1** Kaplan Meier curve for the probability of composite endpoint (recurrent ischemic stroke or TIA, systemic embolism, myocardial infarction, hemorrhagic stroke, major bleeding or all-cause death) within three months after the index stroke/TIA according to sex (A) and age (B) in 708 AF patients with known AF at the time of the index stroke/TIA and hospitalization within 72 hours of symptom onset (“complete study cohort”). Log-Rank test was used to test group differences.

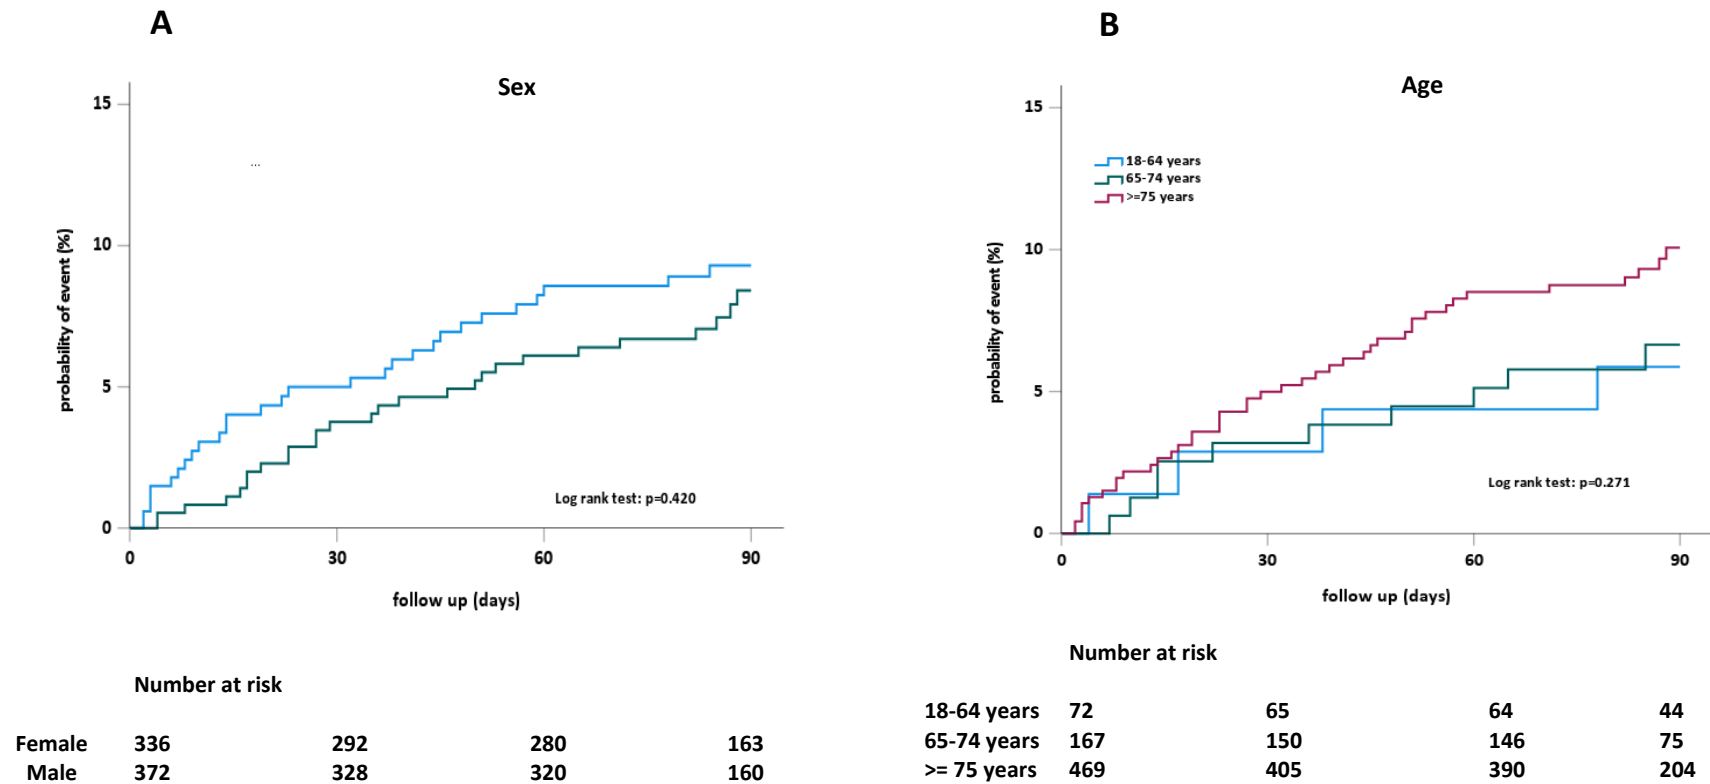

**Figure S2** Kaplan Meier curve for the probability of composite endpoint (recurrent ischemic stroke or TIA, systemic embolism, myocardial infarction, hemorrhagic stroke, extracranial major bleed or all-cause death) within three months after the index stroke/TIA according to guideline adherence of the “1–3–6–12 days rule” with different timing of (re-)starting of oral anticoagulation (‘earlier’, ‘timely’ or ‘later’ start of oral anticoagulation) in 649 AF patients. Event-time began as soon as the status of guideline adherence was determined for each patient (i.e. for the group ‘early’ and ‘timely’ at the day of the OAC start and for the group late at day 13). 12 patients were excluded as the guideline adherence status was undetermined at the time of the event. Log-Rank test was used to test group differences.

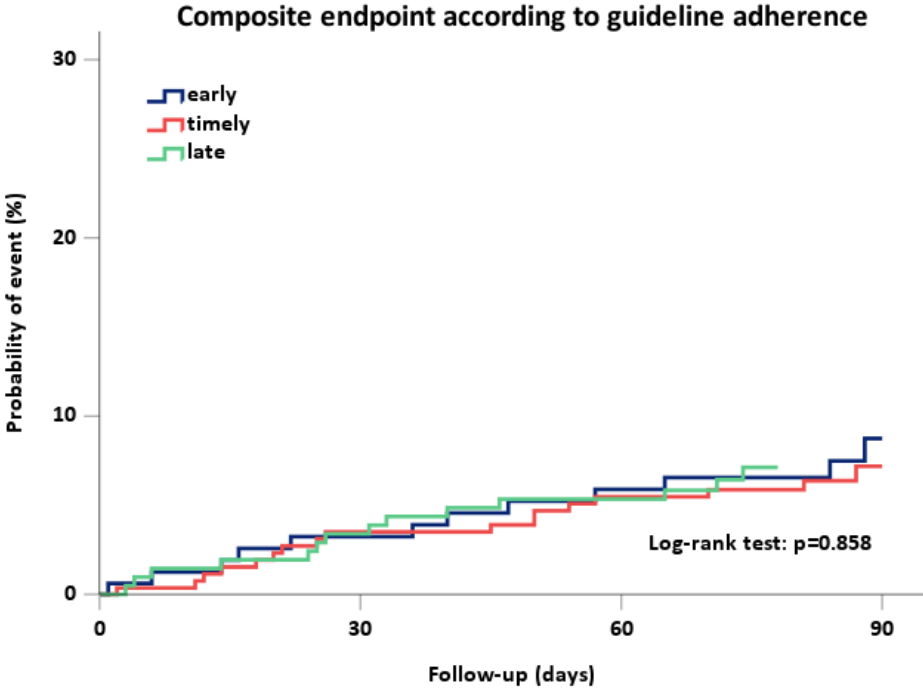

|                             | Number at risk |     |     |     |
|-----------------------------|----------------|-----|-----|-----|
| Early oral anticoagulation  | 162            | 146 | 142 | 22  |
| Timely oral anticoagulation | 280            | 245 | 239 | 24  |
| Late oral anticoagulation   | 207            | 199 | 193 | 119 |

**Figure S3** Kaplan Meier curve for the probability of composite endpoint (recurrent ischemic stroke or TIA, systemic embolism, myocardial infarction, hemorrhagic stroke, extracranial major bleed or all-cause death) within three months after the index stroke/TIA according to guideline adherence of the “1–3–6–12 days rule” with different timing of (re-)starting of non-vitamin K antagonist oral anticoagulants (NOAC) (‘earlier’, ‘timely’ or ‘later’ start of oral anticoagulation) in 510 AF patients. Event-time began as soon as the status of guideline adherence was determined for each patient (i.e. for the group ‘early’ and ‘timely’ at the day of the OAC start and for the group late at day 13). 11 patients were excluded as the guideline adherence status was undetermined at the time of the event. Log-Rank test was used to test group differences.

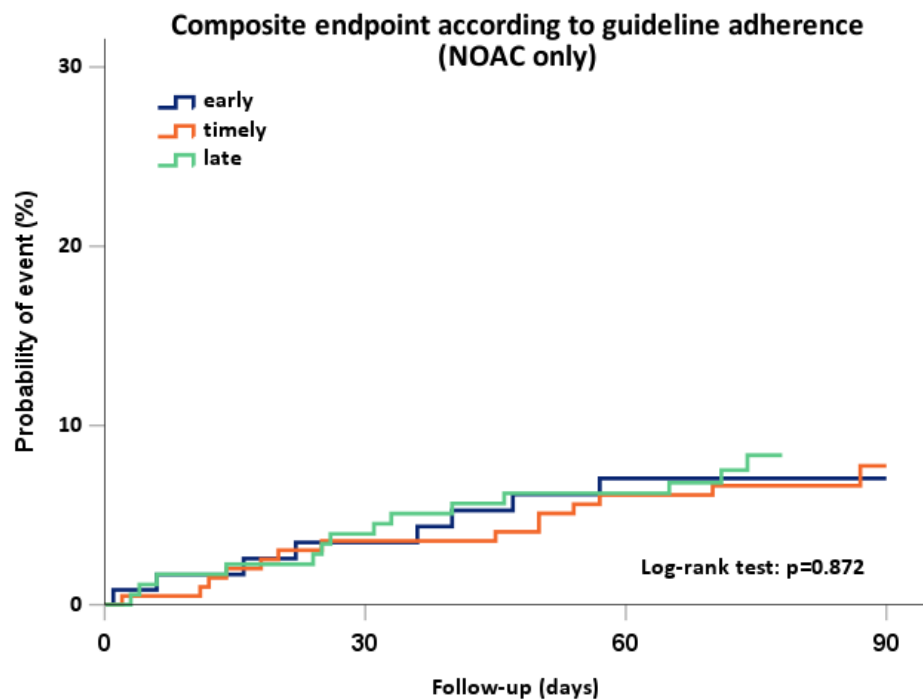

|                             | Number at risk |     |     |    |
|-----------------------------|----------------|-----|-----|----|
| Early oral anticoagulation  | 121            | 108 | 104 | 14 |
| Timely oral anticoagulation | 212            | 188 | 182 | 14 |
| Late oral anticoagulation   | 177            | 170 | 164 | 97 |

**Figure S4** Kaplan Meier curve for the probability of recurrent stroke (composite of recurrent ischemic stroke or TIA and hemorrhagic stroke) within three months after the index stroke/TIA in registry patients with (re-)started OAC (early, timely or late) according to the “1-3-6-12 day rule”. Log-Rank test was used to test group differences.

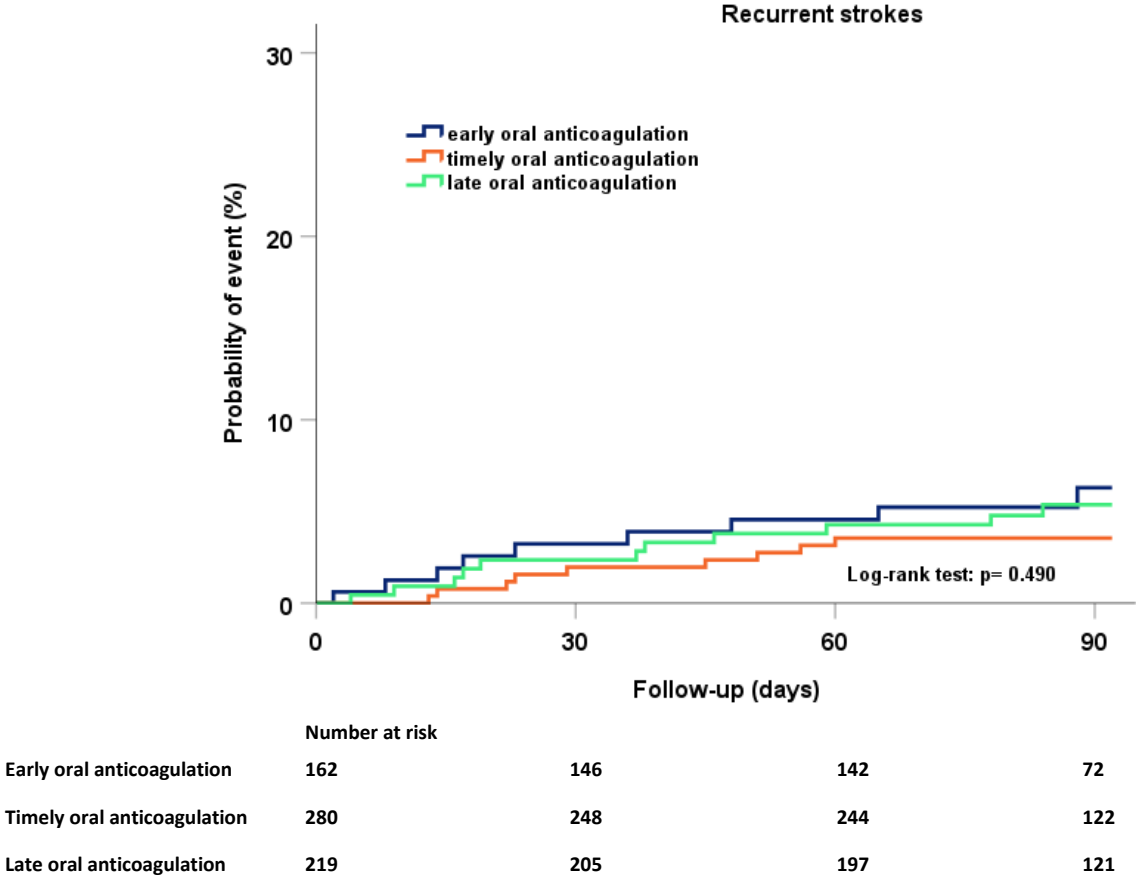

Supplement: openhrt-11-2-s001.pdf [file openhrt-11-2-s001.pdf]
